# Supplementary material for: Ultrathin Ni–Ni3Se2 nanosheets on graphene as a high-performance counter electrode for dye-sensitized solar cells
Source: Royal Society of Chemistry journal article supplement (doi:10.1039/c6ra18151a), 2016-01-01
Supplement: c6ra18151a1.pdf [file c6ra18151a1.pdf]

## Supporting Information

### **Ultrathin Ni-Ni<sub>3</sub>Se<sub>2</sub> nanosheets on graphene as a high-performance counter electrode for dye-sensitized solar cells**

Xiao Zhang, Jinwu Bai, Mengmeng Zhen, Lu Liu\*

Tianjin Key Laboratory of Environmental Remediation and Pollution Control,  
College of Environmental Science and Engineering, Nankai University, Tianjin  
300071, P.R. China.

**Corresponding author (s)**

**E-mail:** liul@nankai.edu.cn.

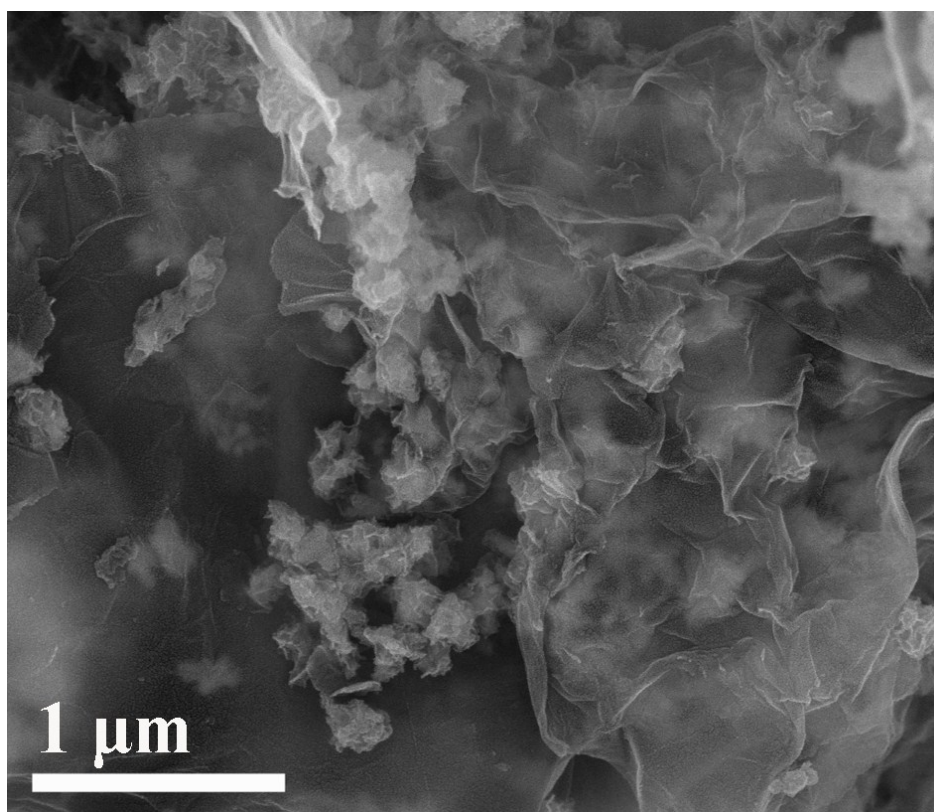

**Fig. S1** TEM image of ultrathin Ni-Ni<sub>3</sub>Se<sub>2</sub>/graphene nanosheets.

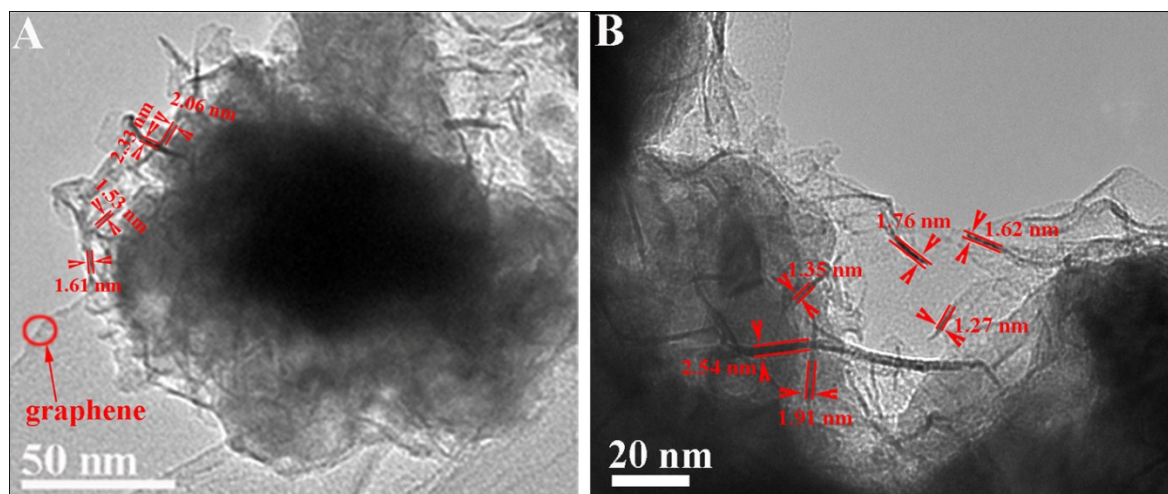

**Fig. S2** TEM images and the thickness of ultrathin Ni-Ni<sub>3</sub>Se<sub>2</sub>/graphene nanosheets.

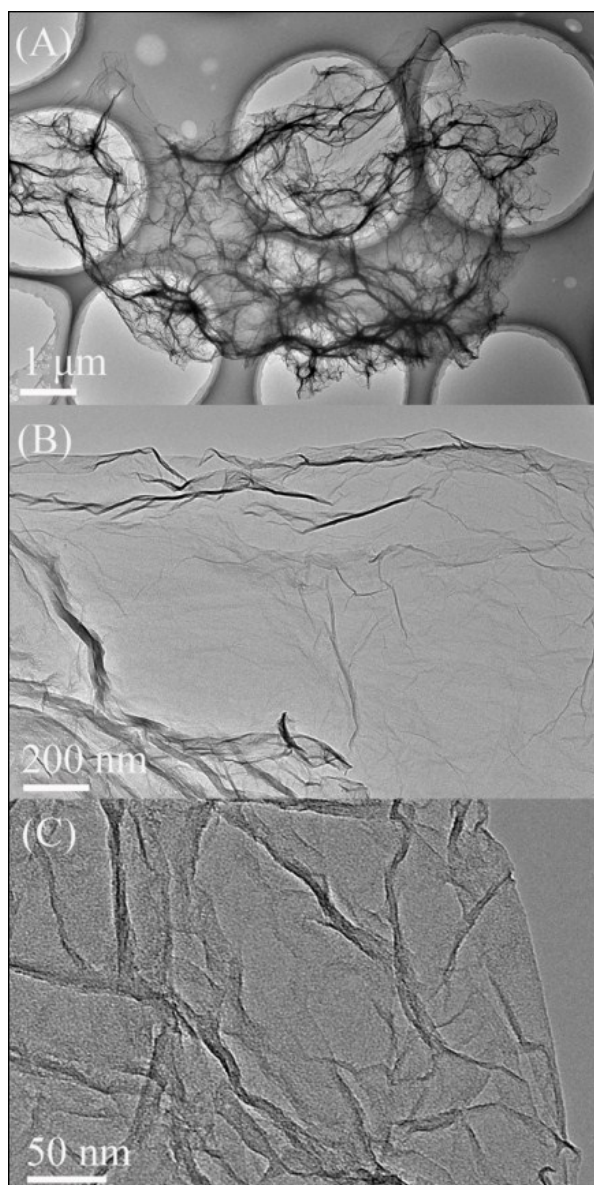

**Fig. S3** TEM images of graphene at different magnifications.

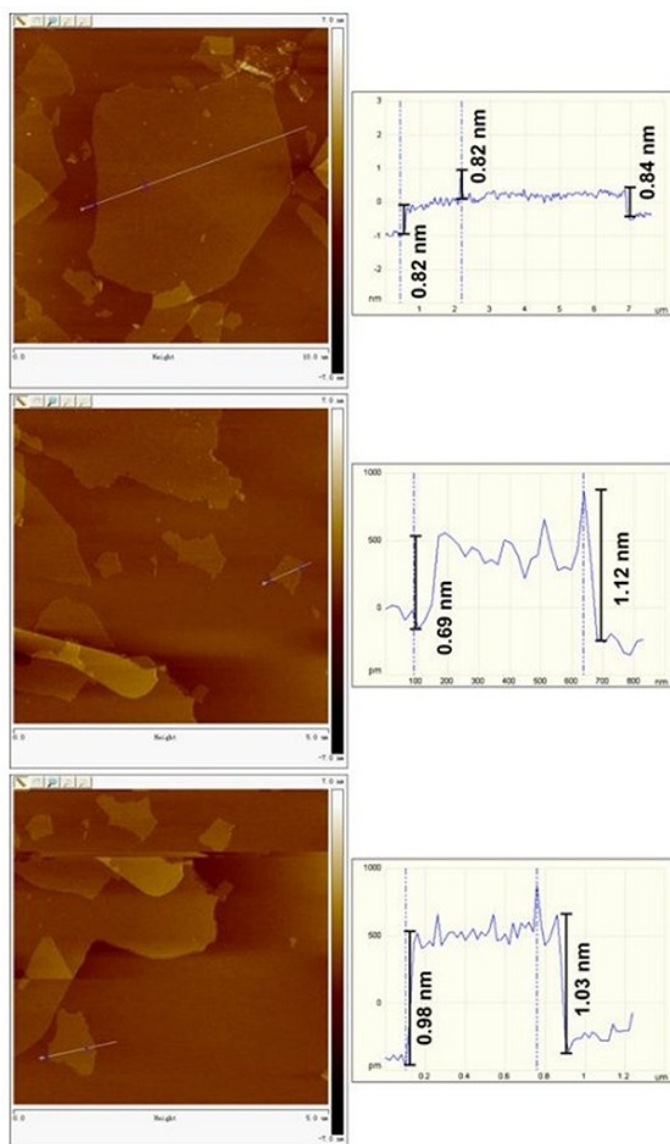

**Fig. S4** AFM images of GO nanosheets prepared through a modified Hummers' method.

**Table S1.** EIS and Tafel polarization parameters of the DSSCs with Ni-Ni<sub>3</sub>Se<sub>2</sub>/graphene, Pt and graphene as counter electrode.

| CEs                                          | $R_s/\Omega$ | $J_{lim}/\log(\text{mA cm}^{-2})$ | $J_0/\log(\text{mA cm}^{-2})$ |
|----------------------------------------------|--------------|-----------------------------------|-------------------------------|
| Ni-Ni <sub>3</sub> Se <sub>2</sub> /graphene | 12.70        | 1.86                              | 0.72                          |
| Graphene                                     | 13.03        | 1.55                              | 0.18                          |
| Pt                                           | 12.99        | 1.64                              | 0.47                          |
